# Supplementary material
Source: publisher figshare collection journal article supplement (https://acs.figshare.com/ndownloader/files/3936292)
Supplement: Supplementary file 1 [file 3936292]

# Supporting Information for

## Charged Polymer Brushes-Grafted Hollow Silica Nanoparticles as a Novel Promising Material for Simultaneous Joint Lubrication and Treatment

*Guoqiang Liu<sup>†,‡</sup>, Meirong Cai<sup>†\*</sup>, Feng Zhou<sup>†\*</sup> and Weimin Liu<sup>†</sup>*

<sup>†</sup>State Key Laboratory of Solid Lubrication, Lanzhou Institute of Chemical Physics, Chinese Academy of Sciences, Lanzhou 730000, China

<sup>‡</sup>Graduate School of Chinese Academy of Sciences, Beijing 100039, China

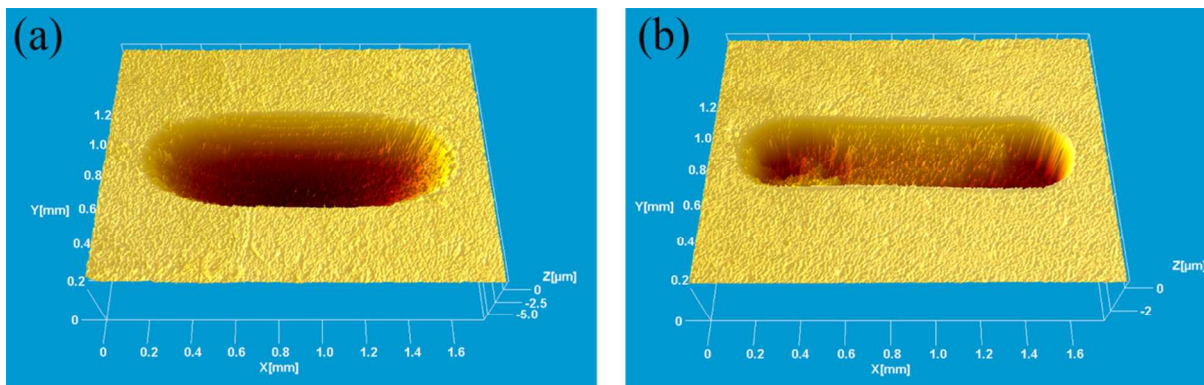

**Figure S1.** Three-dimensional topography images of pure water (a) and PSPMA brushes-grafted HSNPs suspension (b) (0.3 wt.%) under a normal load of 50 N.

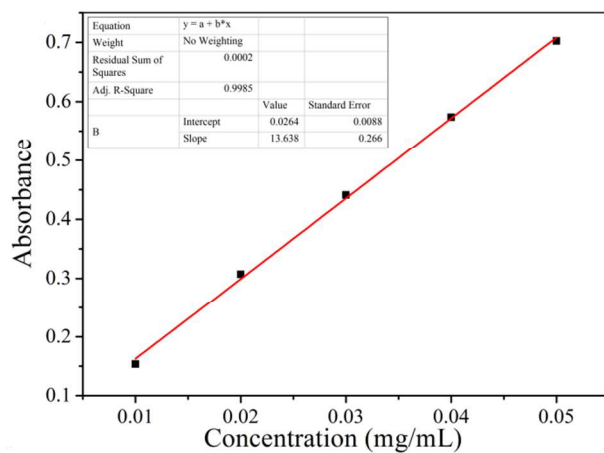

**Figure S2.** The calibration curve of aspirin drawn based on the UV absorption.

This material is available free of charge via the Internet at <http://pubs.acs.org>.
